# Supplementary figures and images for: Maternal Donor and Genetic Variation of Lagerstroemia indica Cultivars
Source: MDPI journal article supplement (doi:10.3390/ijms24043606), 2023-02-10

**a**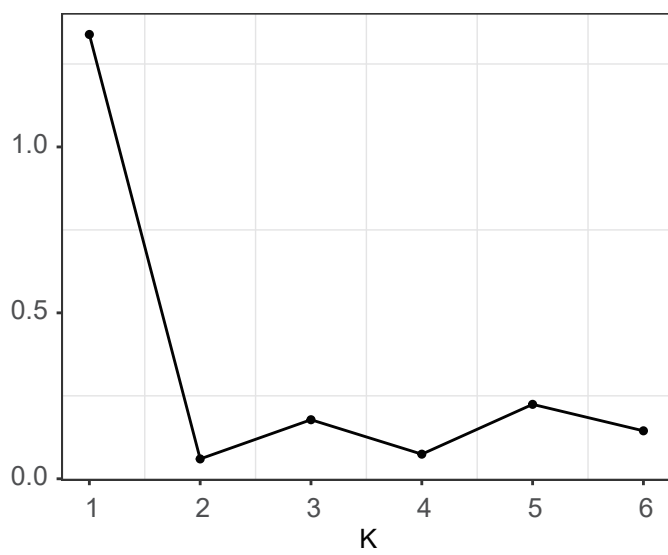**b**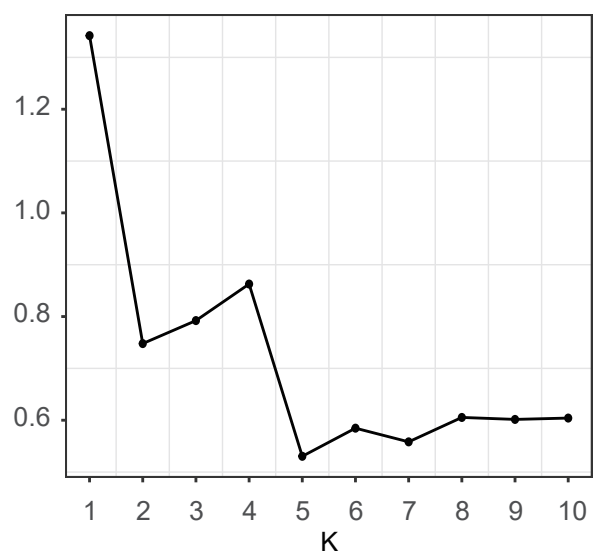

Supplement: s1 [file s1]
